# Supplementary material
Source: PubMed Central journal article supplement (PMC2705289)
Supplement: NIHMS104442-supplement-01.pdf [file NIHMS104442-supplement-01.pdf]

## Supplemental Data:

**Web movie:** Animation of 3D rendering shown in **Fig. 3**.

---

**Supplemental Figure:** Correlation between SPECT signal and autoradiographic measurement of macrophage presence.

SPECT signal was measured drawing ROIs in the *in vivo* SPECT/CT dataset using Osirix software. Arbitrary units (AU) within ROIs in the ascending aorta, aortic arch and descending aorta were measured in n=5 mice, resulting in 15 data points. The numbers of monocytes in these locations was estimated by ROI analysis of autoradiography samples of excised aortas and standards of <sup>111</sup>In-labeled monocytes using ImageJ software.

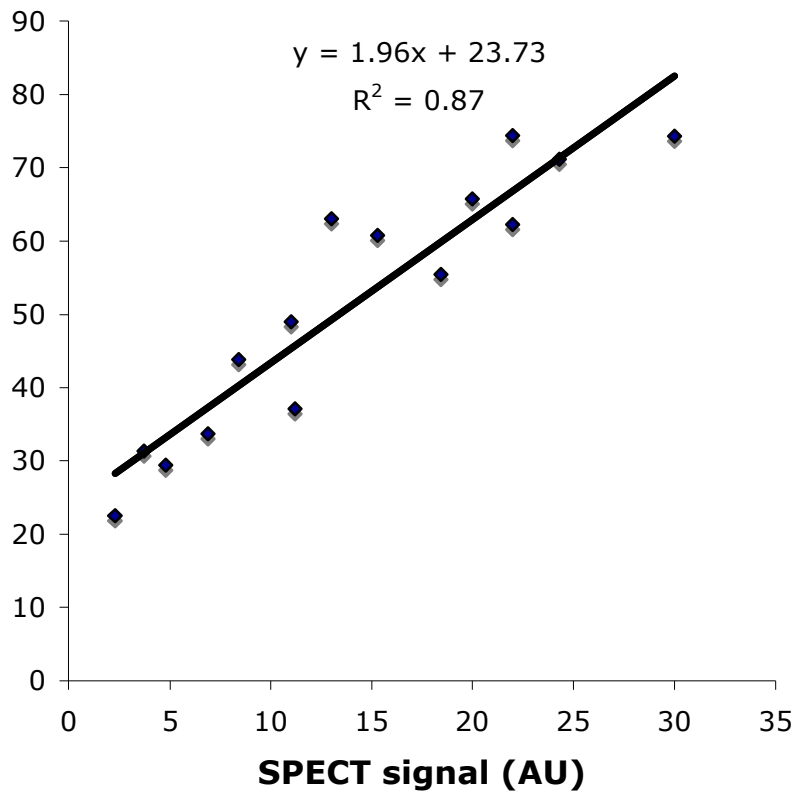

**Supplemental Figure**
